# Supplementary material for: Dually regulating the proliferation and the immune microenvironment of melanomaviananoparticle-delivered siRNA targeting onco-immunologic CD155
Source: Royal Society of Chemistry journal article supplement (doi:10.1039/d0bm01420f), 2020-01-01
Supplement: d0bm01420f1.pdf [file d0bm01420f1.pdf]

## Supplementary data

### Dually Regulating the Proliferation and the Immune Microenvironment of Melanoma *via* Nanoparticle-Delivered siRNA Targeting Onco-Immunologic CD155

*Yan Wang, Ying-Li Luo\*, Yi-Fang Chen, Zi-Dong Lu, Yue Wang, Anna Czarna, Song Shen, Cong-Fei Xu,\* Jun Wang\**

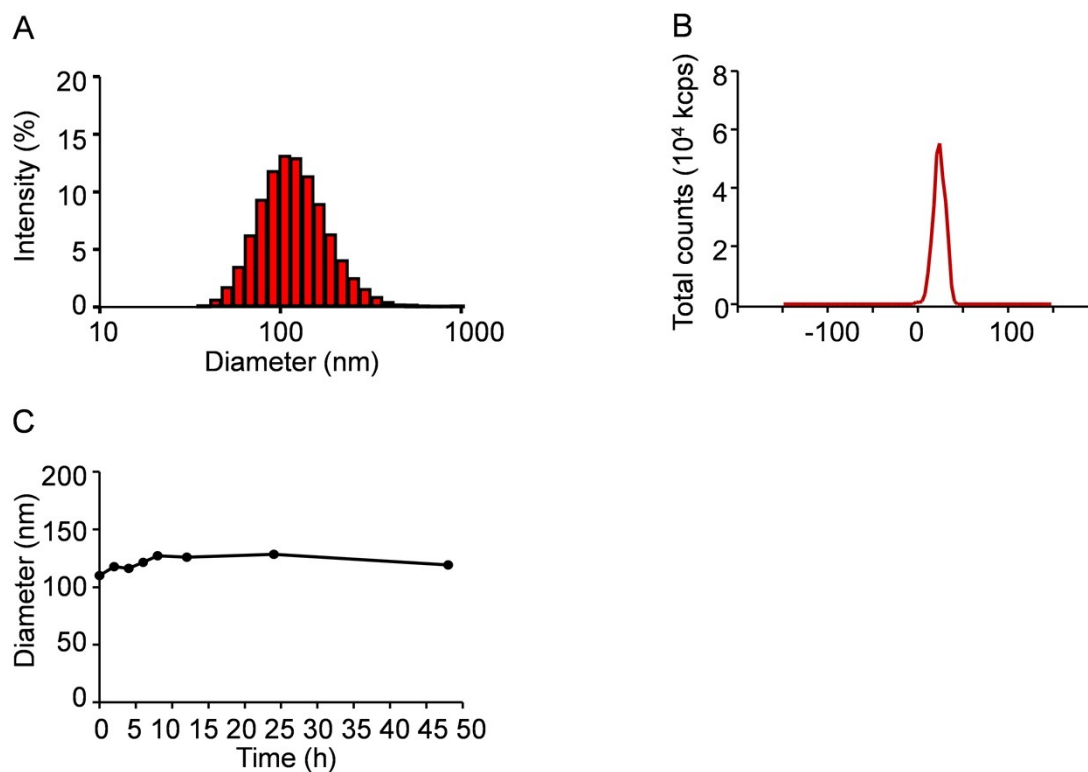

**Fig S1.** The characterizations of CLAN<sub>Cy5-siRNA</sub>. (A-C) Size distribution (A), zeta potentials (B), and serum stability (C) of CLAN<sub>Cy5-siRNA</sub>.

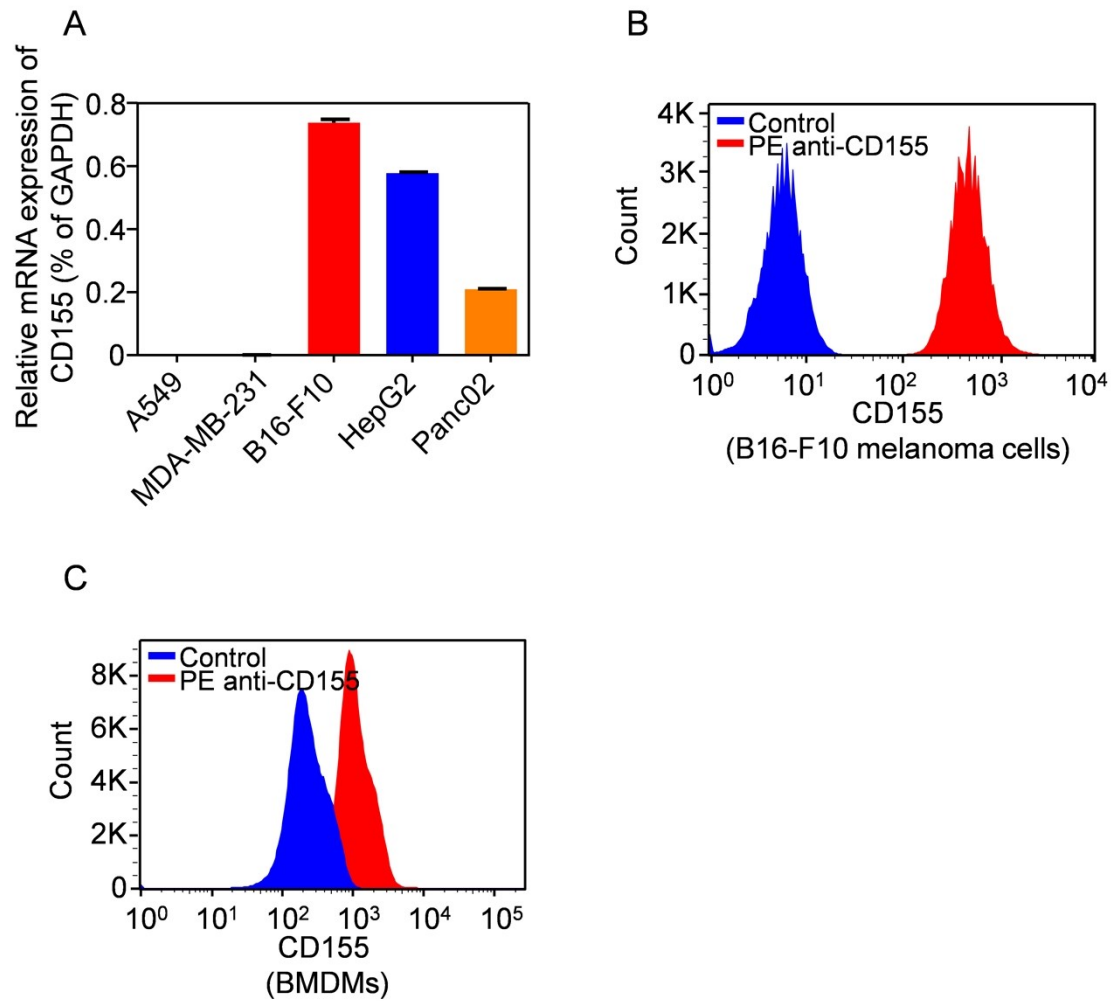

**Fig S2.** (A) The relative mRNA expression of CD155 in different tumor cell lines. (B and C) Flow cytometry analysis of CD155 expression in B16-F10 melanoma cells (B) and BMDMs (C). CD155 was labelled with PE anti-mouse CD155 antibody.

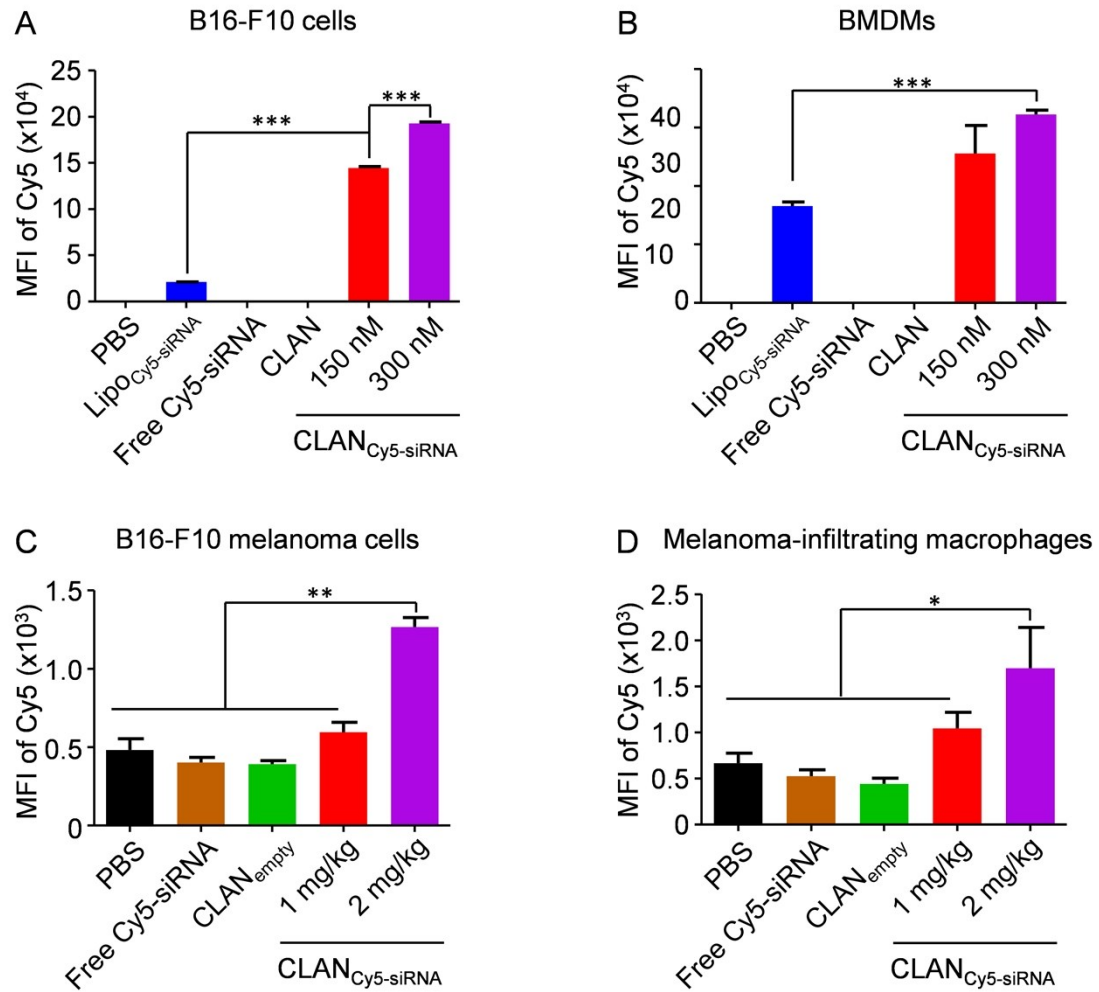

**Fig S3.** Cellular uptake of CLAN<sub>Cy5-siRNA</sub> by melanoma cells and macrophages *in vitro* and *in vivo*. (A, B) MFI of Cy5 fluorescence in B16-F10 cells (A) and BMDMs (B) after transfection of CLAN<sub>Cy5-siRNA</sub> or other controls *in vitro*. (C, D) MFI of Cy5 fluorescence in B16-F10 melanoma cells and melanoma-infiltrating macrophages after intravenous injection of CLAN<sub>Cy5-siRNA</sub> or other controls. Data are shown as the means  $\pm$  SD (n = 3), one-way ANOVA with post-hoc analysis, \*  $P < 0.05$ , \*\*  $P < 0.01$  and \*\*\*  $P < 0.001$ .

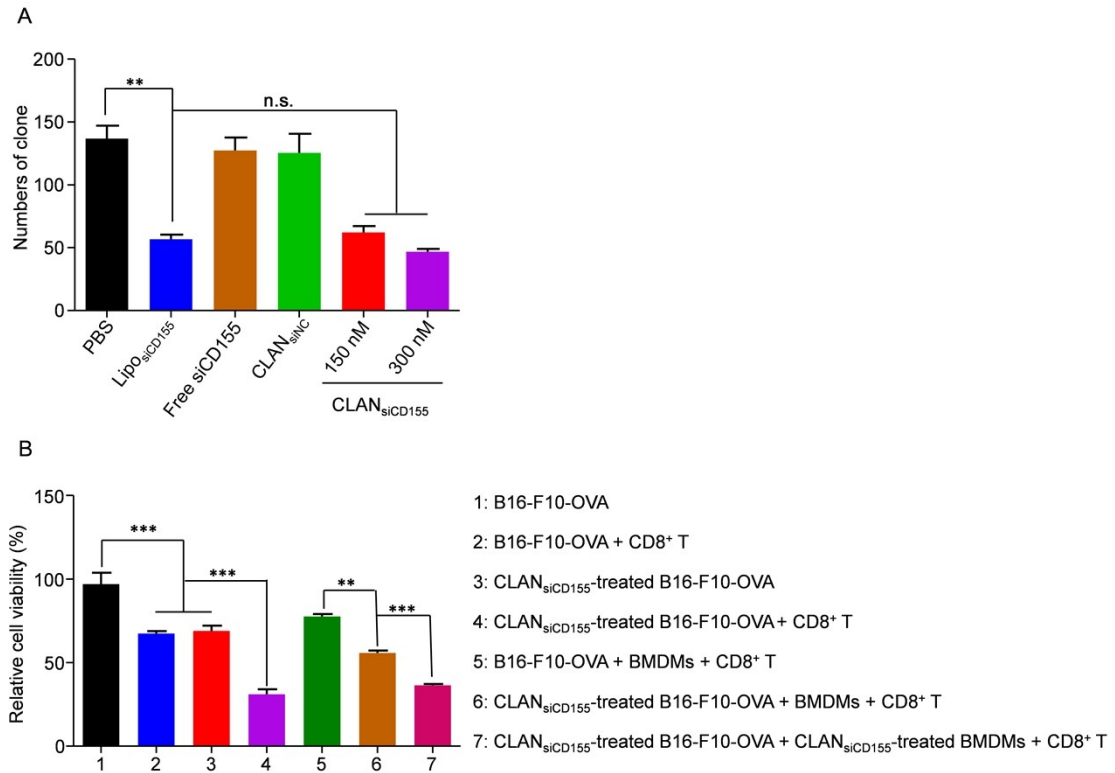

**Fig S4.** Cell clone formation assay of B16-F10 cells and the cytotoxicity of antigen-specific CD8<sup>+</sup> T cells to B16-F10-OVA cells. (A) Statistical analysis of the numbers of B16-F10 cell clone in Fig. 3F. (B) The relative cell viability of B16-F10-OVA cells after co-culture with CD8<sup>+</sup> T cells. B16-F10-OVA cells or BMDMs were treated or not with CLAN<sub>siCD155</sub> before co-culture. Data are shown as the means  $\pm$  SD (n = 3), one-way ANOVA with post-hoc analysis, \*\*  $P < 0.01$ , \*\*\*  $P < 0.001$  and n.s.  $P > 0.05$ .

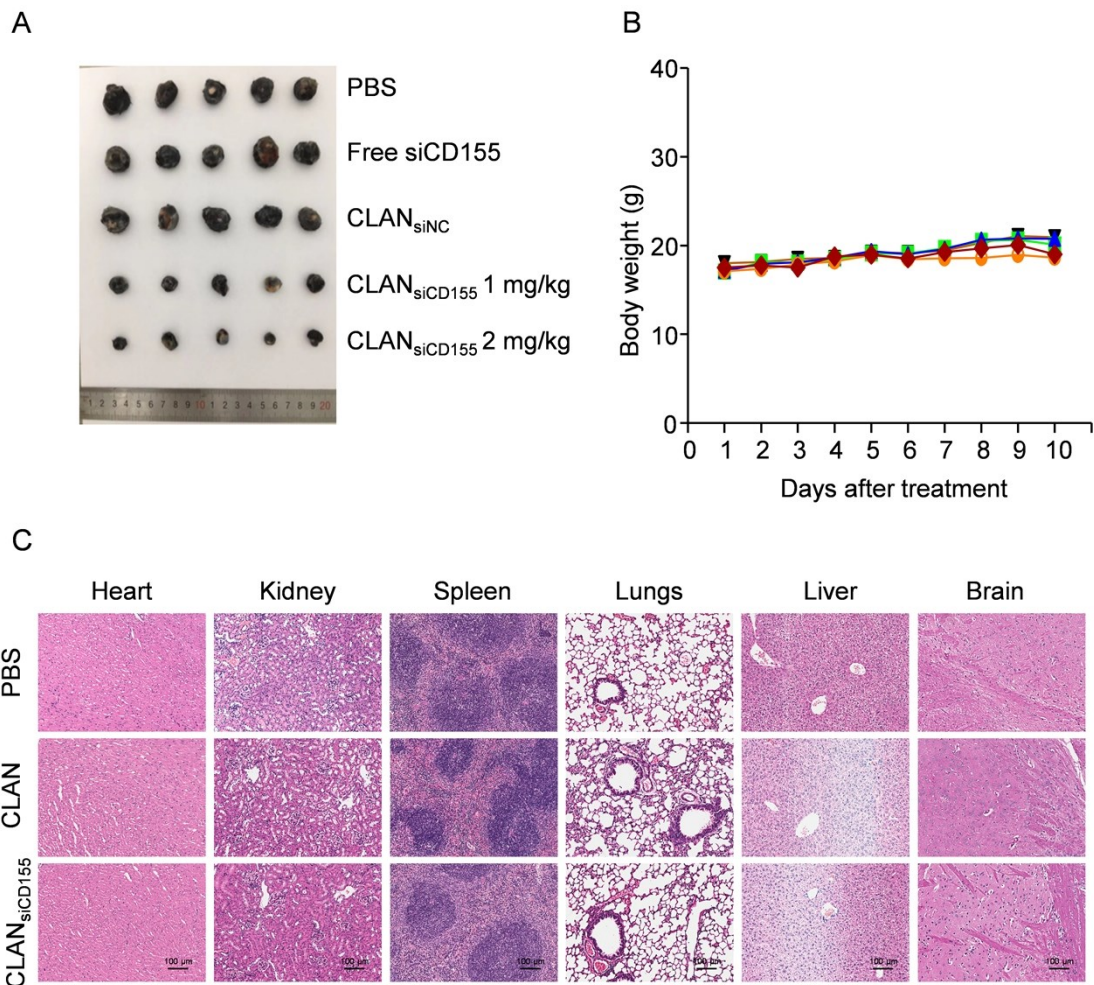

**Fig S5.** (A) Tumor images of melanoma isolated from B16-F10-bearing mice at the end of the treatments. (B) Body weight change of B16-F10-bearing mice during the treatments. Data are shown as the means  $\pm$  SD ( $n = 5$ ). (C) H&E analysis of heart, kidney, spleen, lungs, liver and brain tissue after the treatment of CLAN or CLAN<sub>siCD155</sub>.

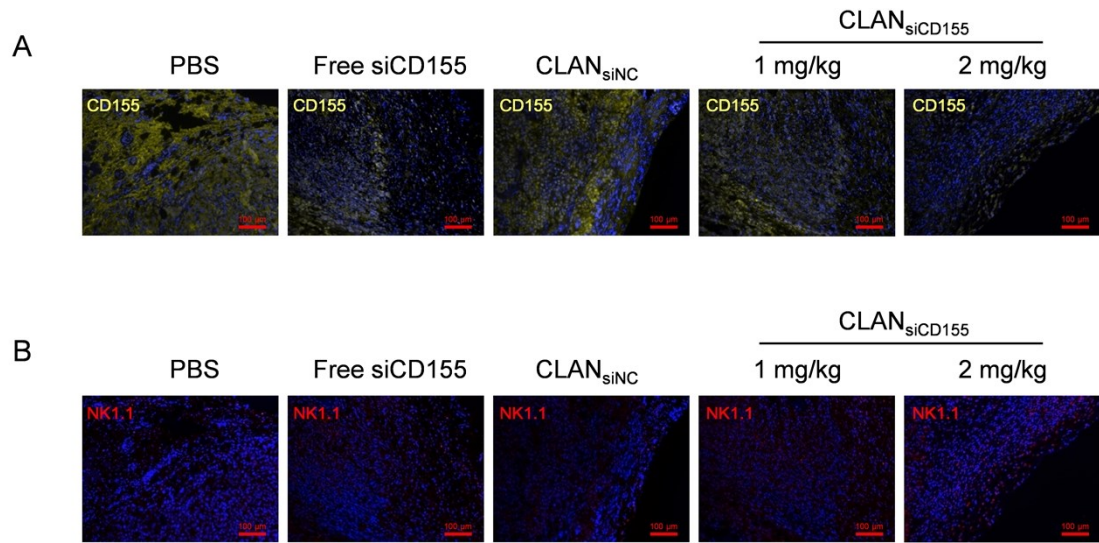

**Fig S6.** Original staining images of CD155 (A) and NK1.1 (B) from multispectral immunofluorescence assay.
